# Supplementary material for: The Positive Effects of Increased Light Intensity on Growth and Photosynthetic Performance of Tomato Seedlings in Relation to Night Temperature Level
Source: MDPI journal article supplement (doi:10.3390/agronomy12020343), 2022-01-29
Supplement: s1 [file s1]

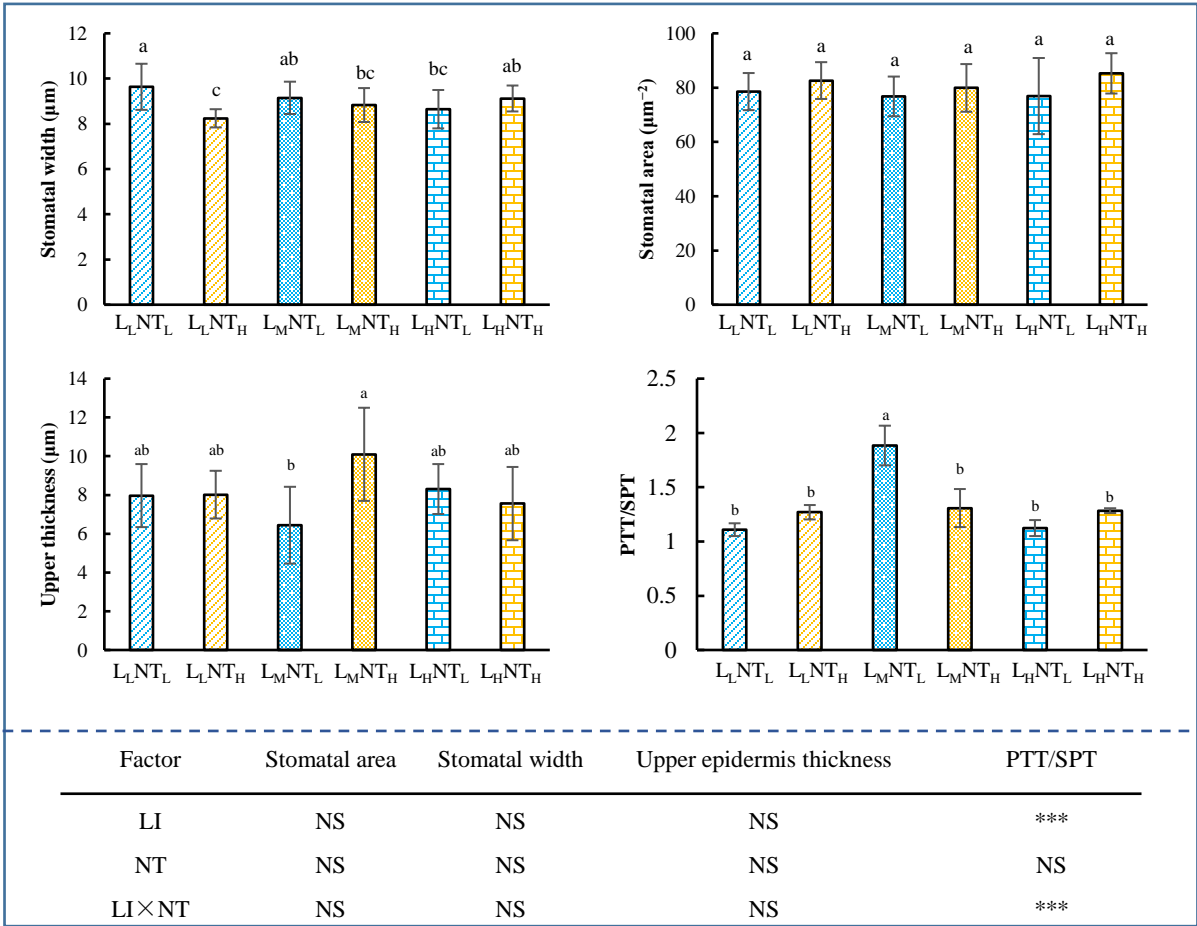

**Figure S2. Effect of light intensity (LI) and night temperature (NT) on the stomata characteristics, upper epidermis thickness and PTT/SPT of cherry tomato seedlings and LI and NT interaction analysis.** PTT, palisade tissue thickness; SPT, spongy tissue thickness; PTT/SPT, the ratio of PTT to SPT. Abbreviations of different treatments were as described in Fig. 1. The symbol “NS” and “\*\*\*” indicate no significance at  $P < 0.05$ , and significant level at  $P < 0.001$  by Duncan’s test, respectively. Different letters on bars for the same parameter indicate statistically significant differences ( $P < 0.05$ ).
