# Supplementary material for: The Positive Effects of Increased Light Intensity on Growth and Photosynthetic Performance of Tomato Seedlings in Relation to Night Temperature Level
Source: MDPI journal article supplement (doi:10.3390/agronomy12020343), 2022-01-29
Supplement: s1 [file s1]

**Table S2** Fitted photosynthetic parameters via light/CO<sub>2</sub> response curves under different light intensity and night temperature conditions.  $R_d$ , dark respiration rate;  $R_p$ , photorespiration rate;  $R^2$ , Determination coefficient. The abbreviations of growth environments are the same as in the Table 1.

| Parameters                                     | Fitting value from light/CO <sub>2</sub> response curve |                                |                                |                                |                                |                                |
|------------------------------------------------|---------------------------------------------------------|--------------------------------|--------------------------------|--------------------------------|--------------------------------|--------------------------------|
|                                                | L <sub>L</sub> NT <sub>L</sub>                          | L <sub>L</sub> NT <sub>H</sub> | L <sub>M</sub> NT <sub>L</sub> | L <sub>M</sub> NT <sub>H</sub> | L <sub>H</sub> NT <sub>L</sub> | L <sub>H</sub> NT <sub>H</sub> |
| $R_d$ ( $\mu\text{mol m}^{-2} \text{s}^{-1}$ ) | 2.26                                                    | 0.37                           | 1.52                           | 1.13                           | 1.7                            | 0.38                           |
| $R^2$ (light response curve)                   | 0.999                                                   | 0.998                          | 0.993                          | 0.994                          | 0.998                          | 0.983                          |
| $R_p$ ( $\mu\text{mol m}^{-2} \text{s}^{-1}$ ) | 2.90                                                    | 3.29                           | 5.57                           | 6.31                           | 3.40                           | 4.90                           |
| $R^2$ (CO <sub>2</sub> response curve)         | 0.999                                                   | 0.989                          | 0.971                          | 0.982                          | 0.991                          | 0.978                          |
