# Supplementary material for: The Positive Effects of Increased Light Intensity on Growth and Photosynthetic Performance of Tomato Seedlings in Relation to Night Temperature Level
Source: MDPI journal article supplement (doi:10.3390/agronomy12020343), 2022-01-29
Supplement: s1 [file s1]

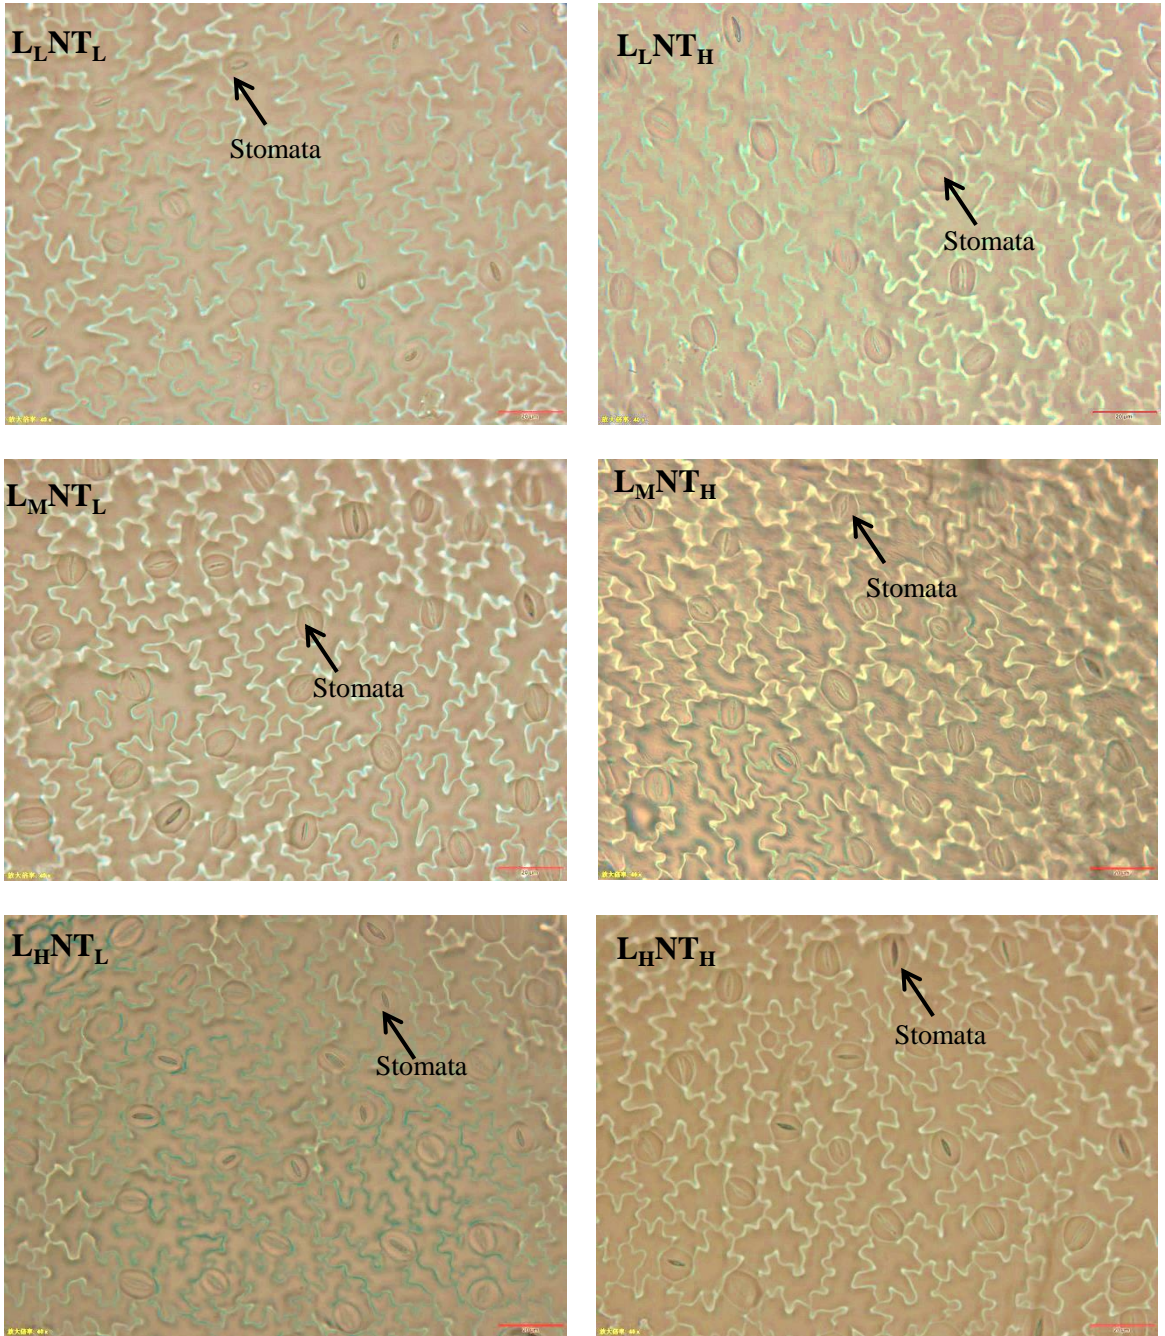

**Figure S1. Electron microscopy of stomata in lower epidermis of cherry tomato grown under different light intensity (LI) and night temperature (NT).** The LI and NT conditions of different treatments as follows:  $L_LNT_L$ ,  $250 \mu\text{mol m}^{-2} \text{s}^{-1}$  and  $15 \pm 1^\circ\text{C}$ ;  $L_LNT_H$ ,  $250 \mu\text{mol m}^{-2} \text{s}^{-1}$  and  $18 \pm 1^\circ\text{C}$ ;  $L_MNT_L$ ,  $300 \mu\text{mol m}^{-2} \text{s}^{-1}$  and  $15 \pm 1^\circ\text{C}$ ;  $L_MNT_H$ ,  $300 \mu\text{mol m}^{-2} \text{s}^{-1}$  and  $18 \pm 1^\circ\text{C}$ ;  $L_HNT_L$ ,  $350 \mu\text{mol m}^{-2} \text{s}^{-1}$  and  $15 \pm 1^\circ\text{C}$ ;  $L_HNT_H$ ,  $350 \mu\text{mol m}^{-2} \text{s}^{-1}$  and  $18 \pm 1^\circ\text{C}$ . Scale bar is  $20 \mu\text{m}$ .
